# Supplementary material for: Alkyne-Tagged Apigenin, a Chemical Tool to Navigate Potential Targets of Flavonoid Anti-Dengue Leads
Source: MDPI journal article supplement (doi:10.3390/molecules26226967), 2021-11-18
Supplement: s1 [file s1]

Supplementary Material

# Alkyne-Tagged Apigenin, a Chemical Tool to Navigate Potential Targets of Flavonoid Anti-Dengue Leads

Kowit Hengphasatporn <sup>1,†</sup>, Benyapa Kaewmalai <sup>2,3,†</sup>, Somruedee Jansongsaeng <sup>4,†</sup>, Vishnu Nayak Badavath <sup>2,†</sup>, Thanaphon Saelee <sup>2</sup>, Thamonwan Chokmahasarn <sup>4</sup>, Tanatorn Khotavivattana <sup>4</sup>, Yasuteru Shigeta <sup>1</sup>, Thanyada Rungrotmongkol <sup>5,6</sup> and Siwaporn Boonyasuppayakorn <sup>2,\*</sup>

<sup>1</sup> Center for Computational Sciences, University of Tsukuba, 1-1-1 Tennodai, Tsukuba, Ibaraki 305-8577, Japan; heng.kowit@gmail.com (K.H.); shigeta@ccs.tsukuba.ac.jp (Y.S.)

<sup>2</sup> Applied Medical Virology Research Unit, Department of Microbiology, Faculty of Medicine, Chulalongkorn University, Bangkok 10330, Thailand; benyapa.k1996@gmail.com (B.K.); vishnu.niper@gmail.com (V.N.B.); thanaphon.saelee@gmail.com (T.S.)

<sup>3</sup> Interdisciplinary Program in Microbiology, Graduate School, Chulalongkorn University, Bangkok 10330, Thailand

<sup>4</sup> Center of Excellence for Natural Product, Department of Chemistry, Faculty of Science, Chulalongkorn University, Pathumwan, Bangkok, 10330, Thailand; somruedee.jan@gmail.com (S.J.); 6133136023@student.chula.ac.th (T.C.); tanatorn.k@chula.ac.th (T.K.)

<sup>5</sup> Structural and Computational Biology Research Unit, Department of Biochemistry, Faculty of Science, Chulalongkorn University, Bangkok 10330, Thailand; thanyada.r@chula.ac.th

<sup>6</sup> Program in Bioinformatics and Computational Biology, Graduate School, Chulalongkorn University, Bangkok 10330, Thailand

\* Correspondence: siwaporn.b@chula.ac.th

† These authors contributed equally to this work.

Overview:

Table S1. List of top10 proteins related to apigenin and their subcellular distribution

Figure S1. A structure overlay of Estradiol and apigenins B-C The 3D structure of dimeric NS1 of DENV2 with the top binding poses from 50 docking runs.

Figures S2–S7  $^1\text{H}$  and  $^{13}\text{C}$ -NMR spectra

Figure S8 Pharmacokinetics, drug-likeness and medicinal chemistry by SwissADME

**Table S1.** List of top10 proteins related to apigenin and their subcellular distribution.

| Targeted Proteins |                                                 | Cellular Distribution       | Prediction of Specific Actions  | Experimental /Biochemical Data | Evidence Suggesting a Function Link (Combined Score) |
|-------------------|-------------------------------------------------|-----------------------------|---------------------------------|--------------------------------|------------------------------------------------------|
| ESR1              | estrogen receptor 1                             | vesicles                    | activation, binding, expression | Yes                            | 0.961                                                |
| UGT1A1            | UDP glucuronosyltransferase 1 family            | cytosol                     | inhibition                      | None                           | 0.949                                                |
| MAOA              | monoamine oxidase A                             | nucleoplasm, mitochondria   | activation                      | None                           | 0.947                                                |
| TP53              | tumor protein p53                               | nucleoplasm                 | Not available                   | None                           | 0.944                                                |
| CDK1              | cyclin-dependent kinase 1                       | Not available               | expression                      | None                           | 0.938                                                |
| CASP3             | caspase 3, apoptosis-related cysteine peptidase | endoplasmic reticulum       | binding                         | Yes                            | 0.877                                                |
| PTGS2             | prostaglandin-endoperoxide synthase 2           | nucleoplasm and microtubule | expression                      | None                           | 0.876                                                |
| AKT1              | v-Akt murine thymoma viral oncogene homolog 1   | mitochondria                | binding, inhibition             | Yes                            | 0.876                                                |
| PARP1             | poly(ADP-ribose) polymerase 1                   | nucleoplasm                 | expression                      | None                           | 0.868                                                |
| CYP1B1            | cytochrome P450                                 | mitochondria, cytosol       | binding                         | Yes                            | 0.848                                                |

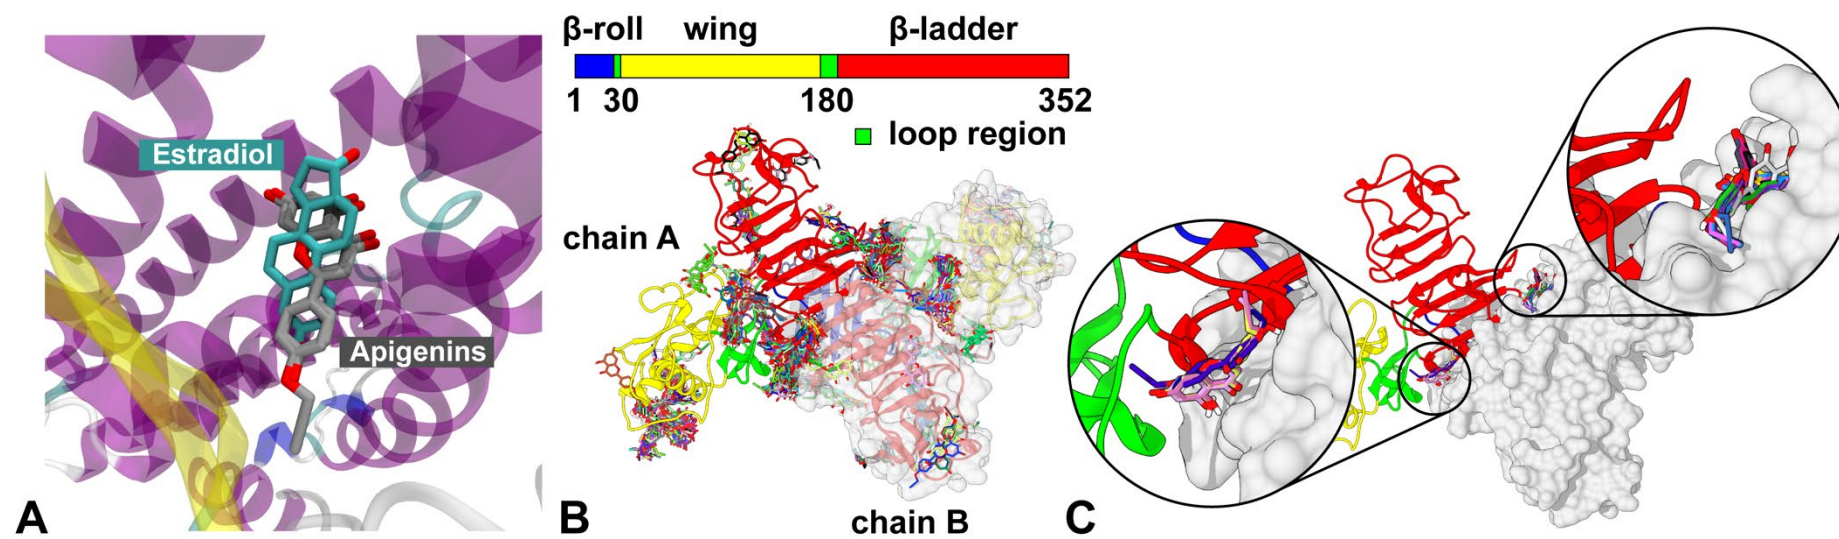

**Figure S1.** (A) structure overlay of Estradiol and apigenins (B,C) The 3D structure of dimeric NS1 of DENV2 with the top binding poses from 50 docking runs.

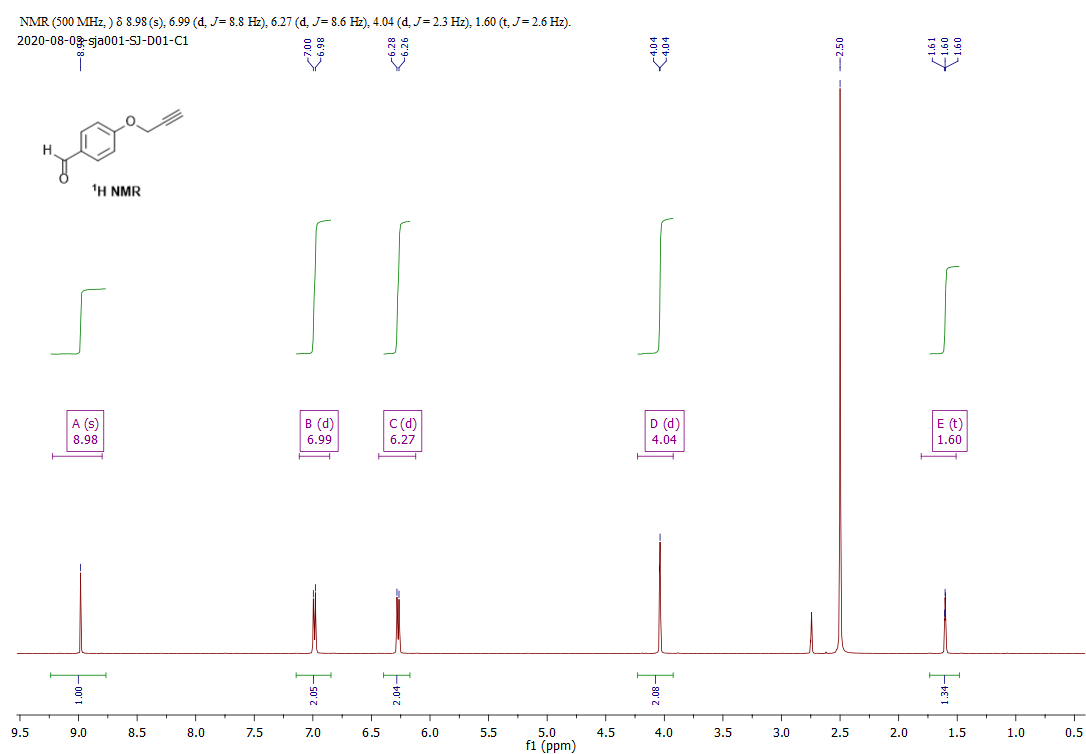

A

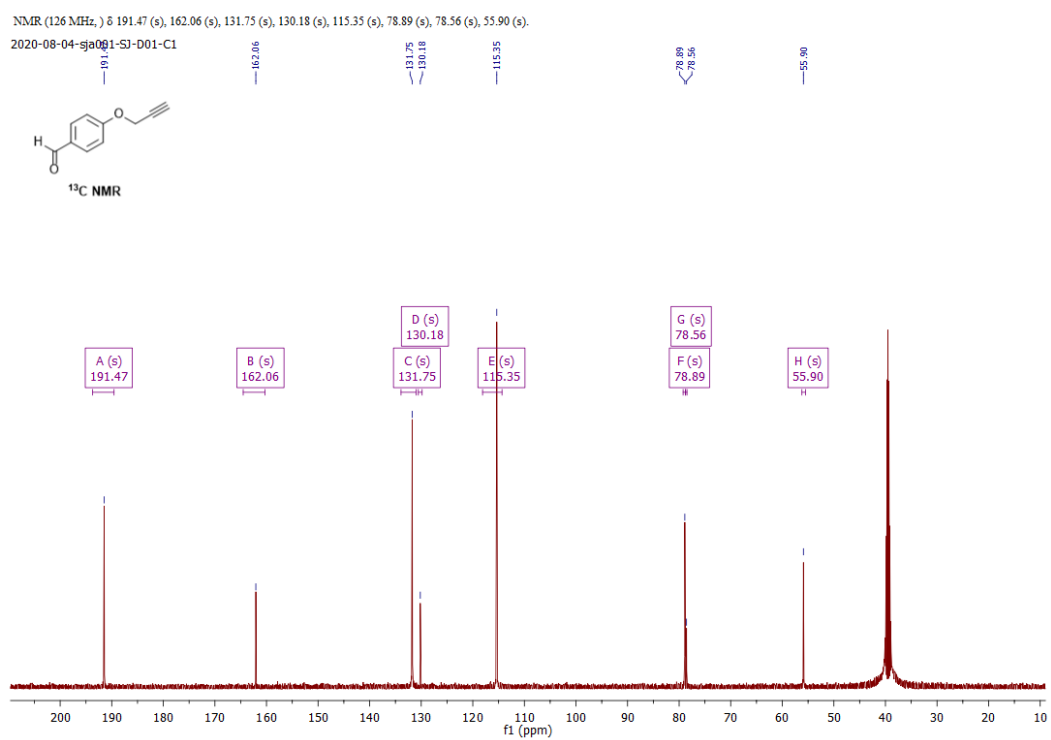

B

Figure S2. <sup>1</sup>H (A) and <sup>13</sup>C-NMR (B) of 4-(prop-2-yn-1-yloxy)benzaldehyde (I).

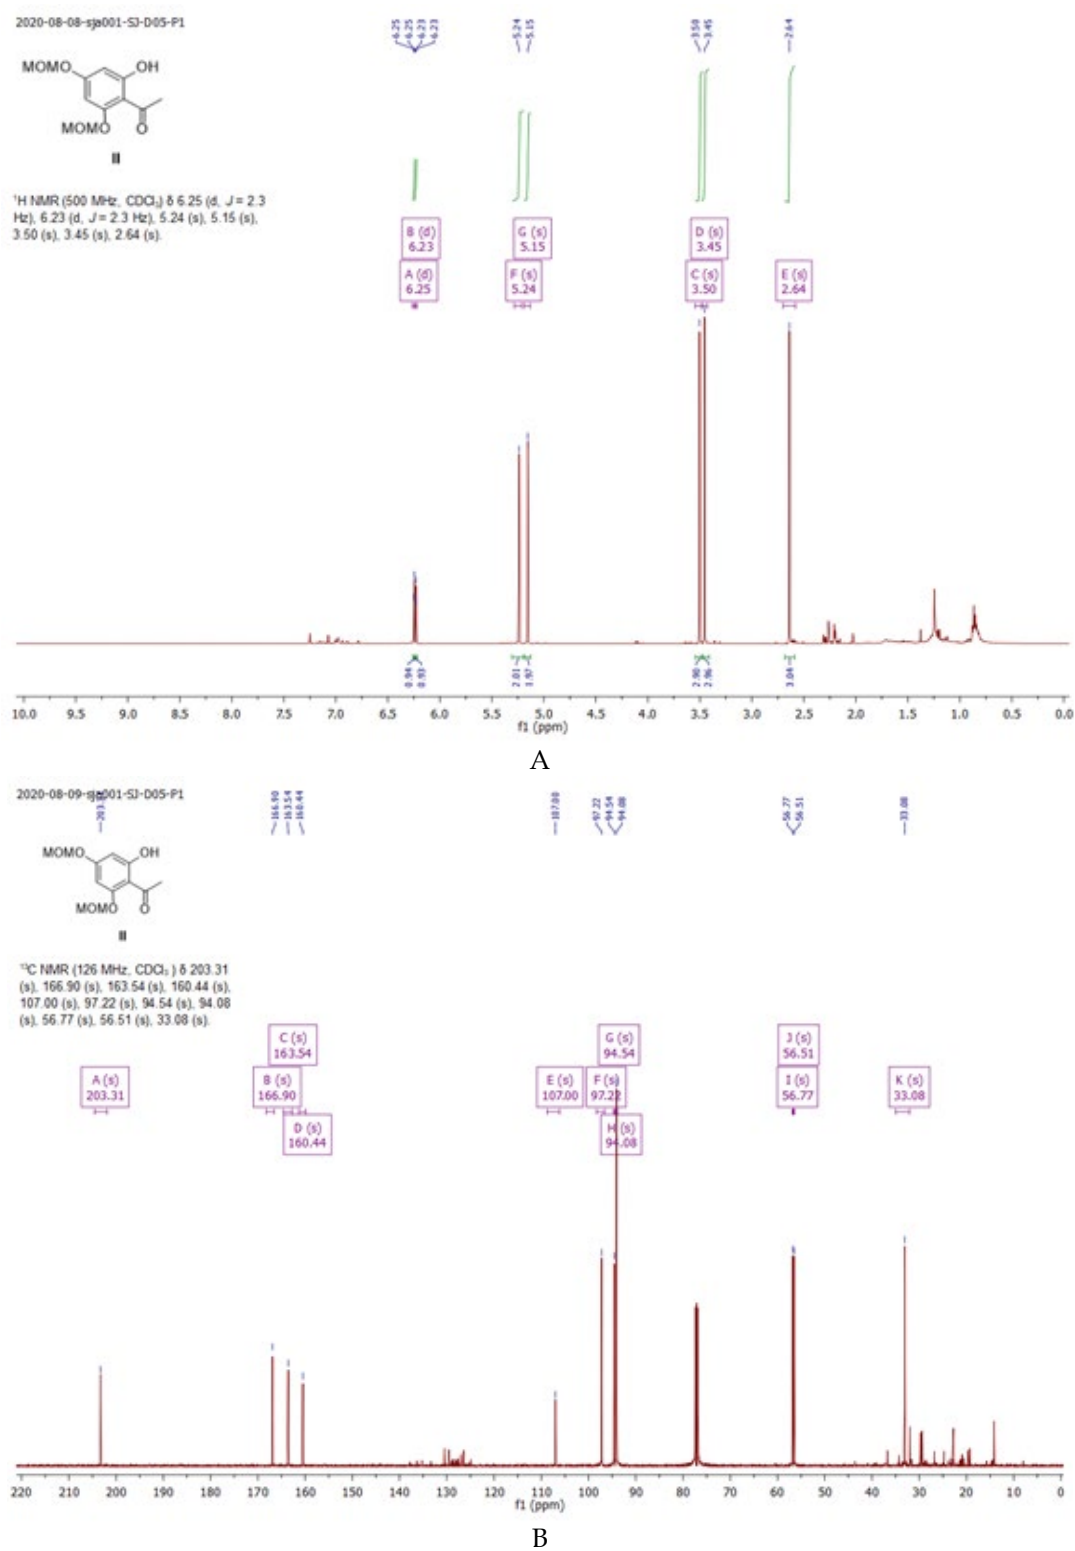

**Figure S3.** <sup>1</sup>H (A) and <sup>13</sup>C-NMR (B) of 1-(2-hydroxy-4,6-bis(methoxymethoxy)phenyl)ethan-1-one (II).

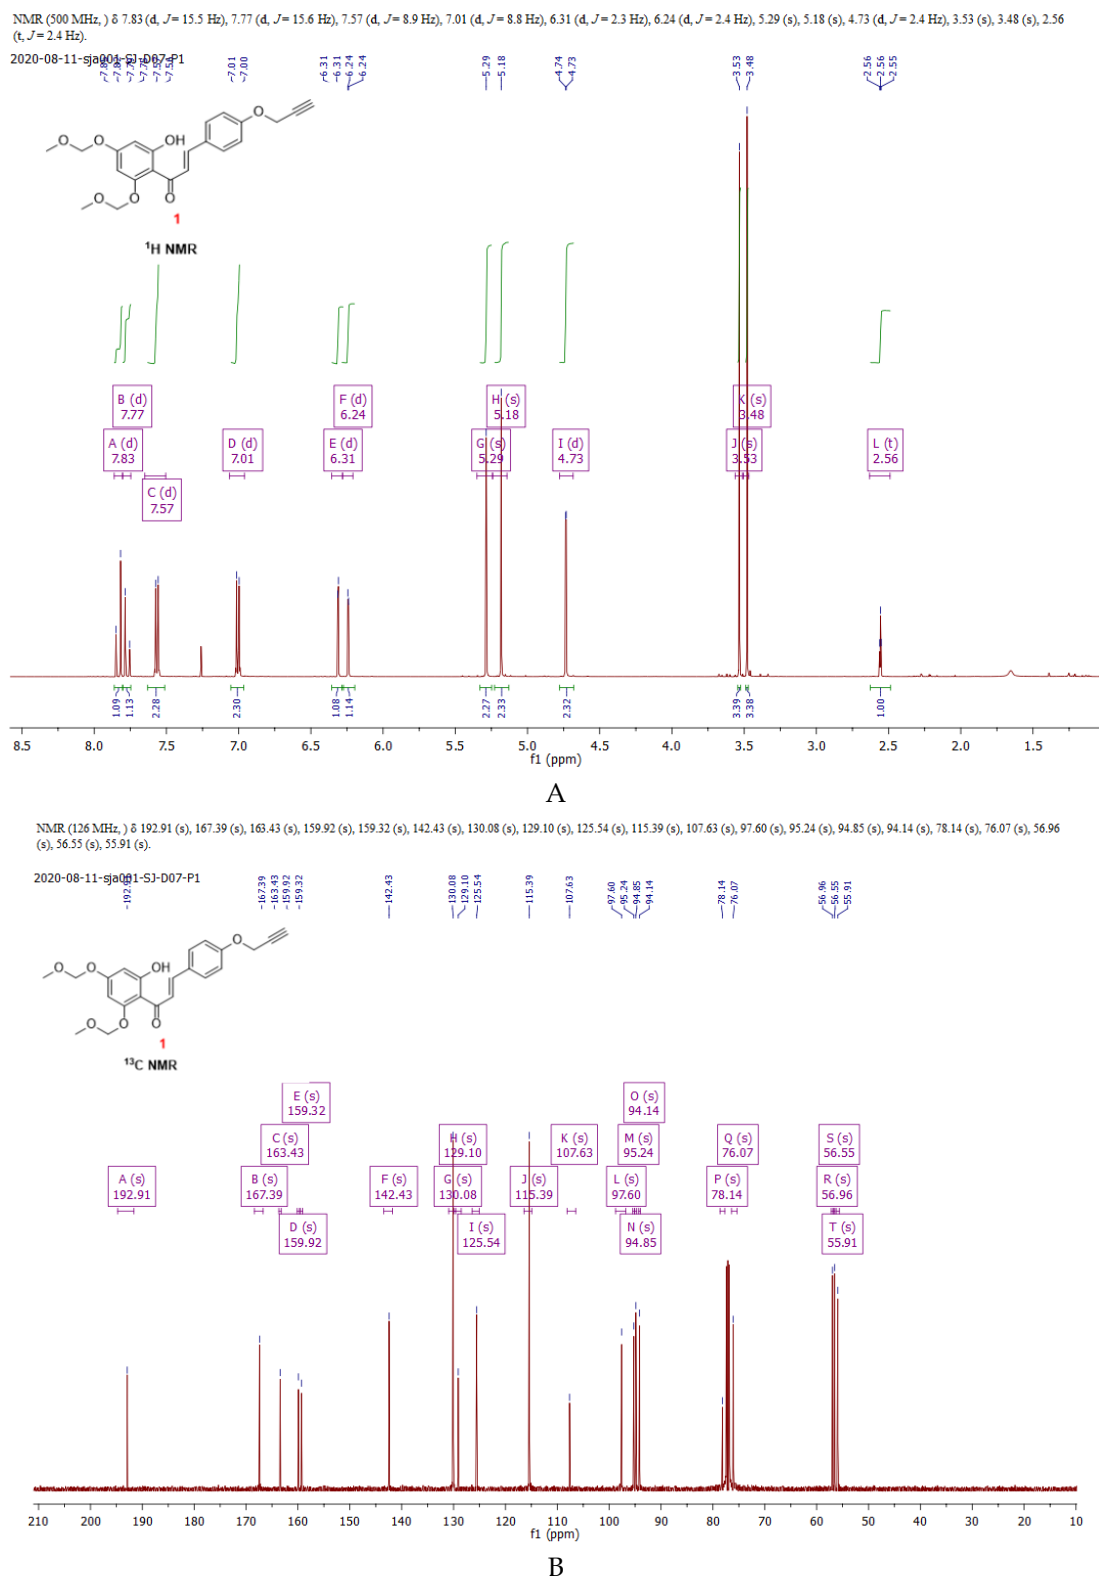

**Figure S4.** <sup>1</sup>H (A) and <sup>13</sup>C-NMR (B) of (*E*)-1-(2-hydroxy-4,6-bis(methoxymethoxy)phenyl)-3-(4-(prop-2-yn-1-yloxy)phenyl)prop-2-en-1-one (1).

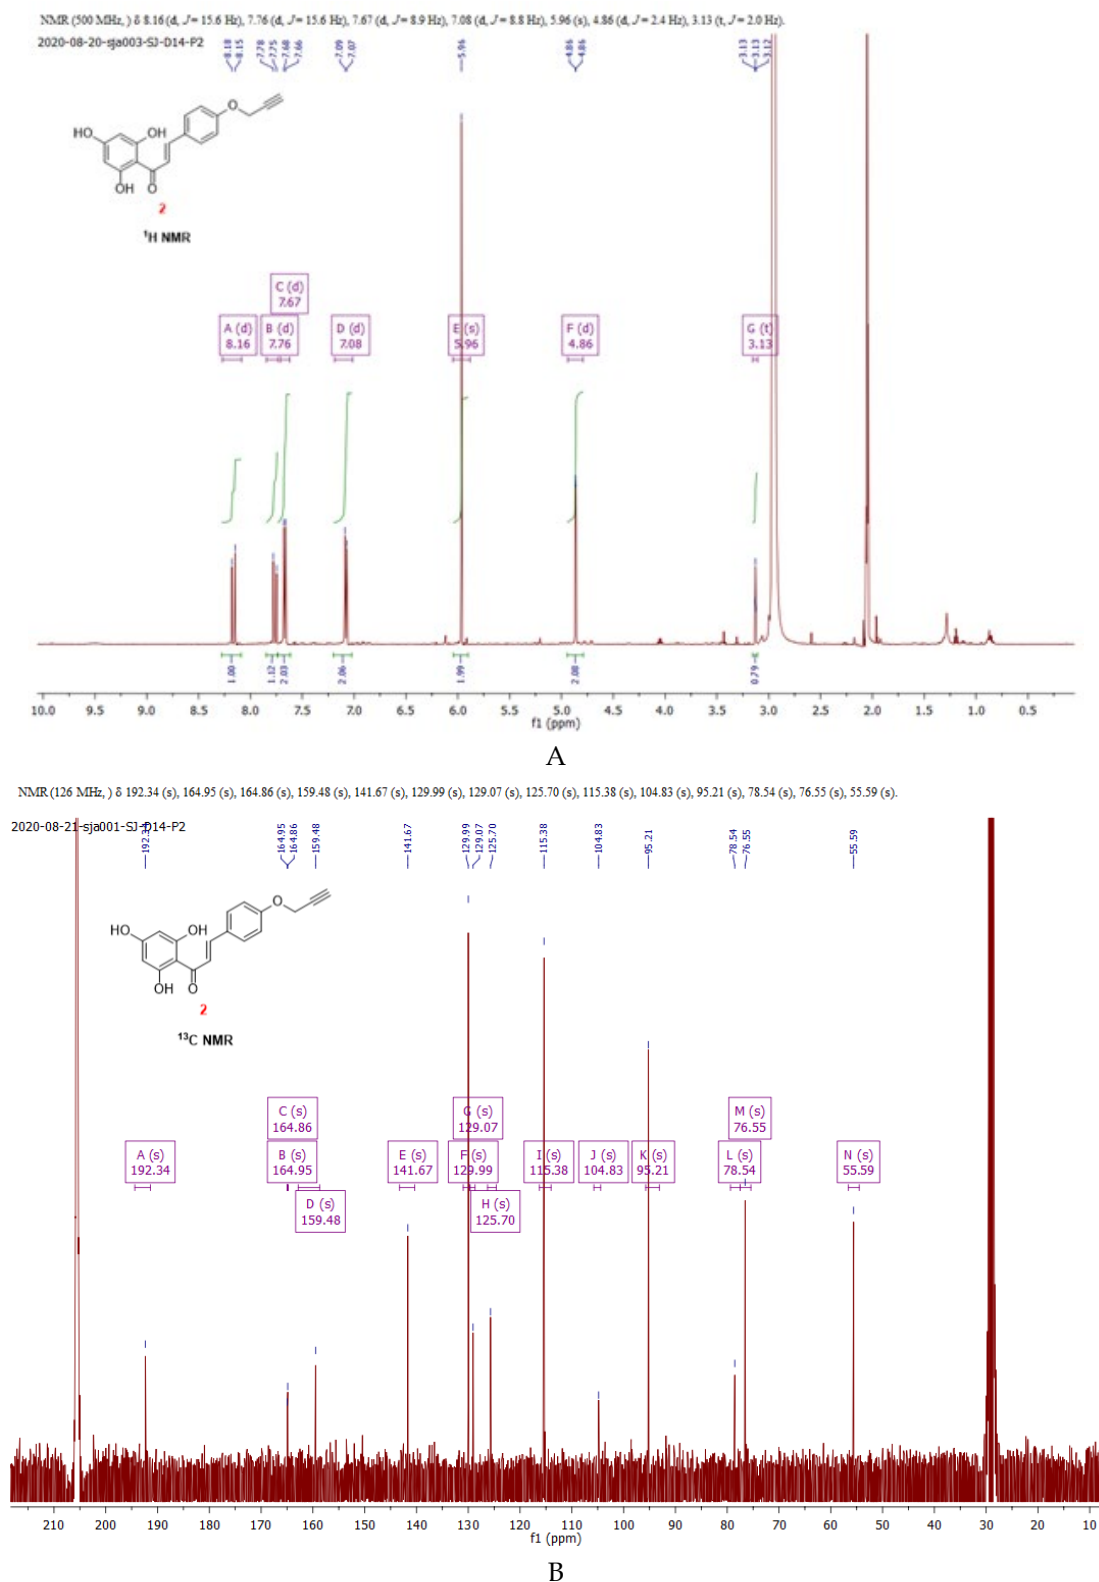

**Figure S5.** <sup>1</sup>H (A) and <sup>13</sup>C-NMR (B) of 5,7-bis(methoxymethoxy)-2-(4-(prop-2-yn-1-yloxy)phenyl)-4H-chromen-4-one (2).

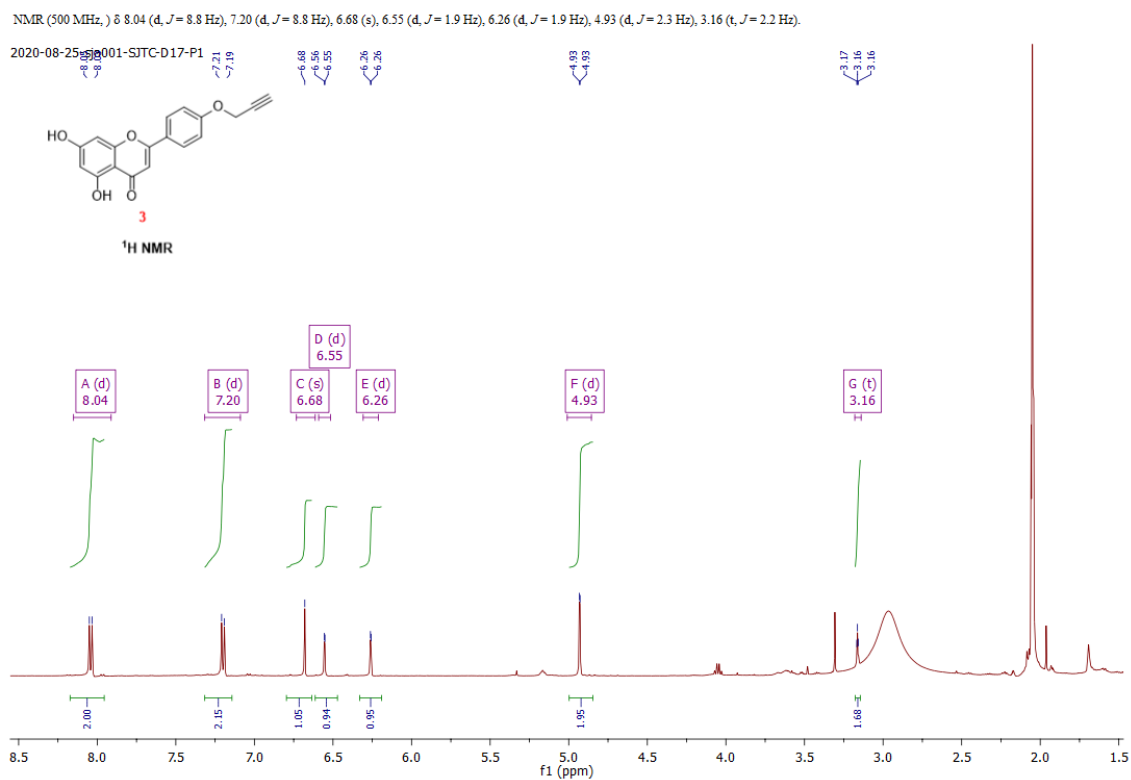

A

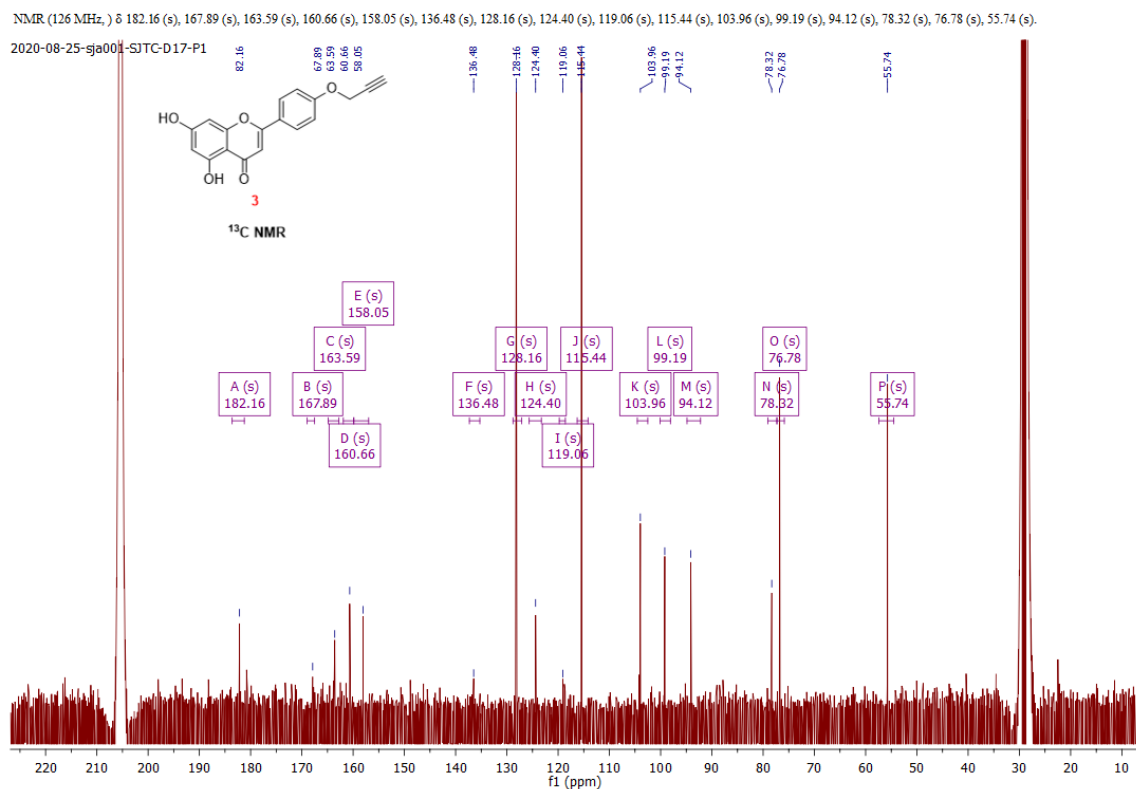

B

**Figure S6.** <sup>1</sup>H (A) and <sup>13</sup>C-NMR (B) of 5,7-dihydroxy-2-(4-(prop-2-yn-1-yloxy)phenyl)-4*H*-chromen-4-one (3).



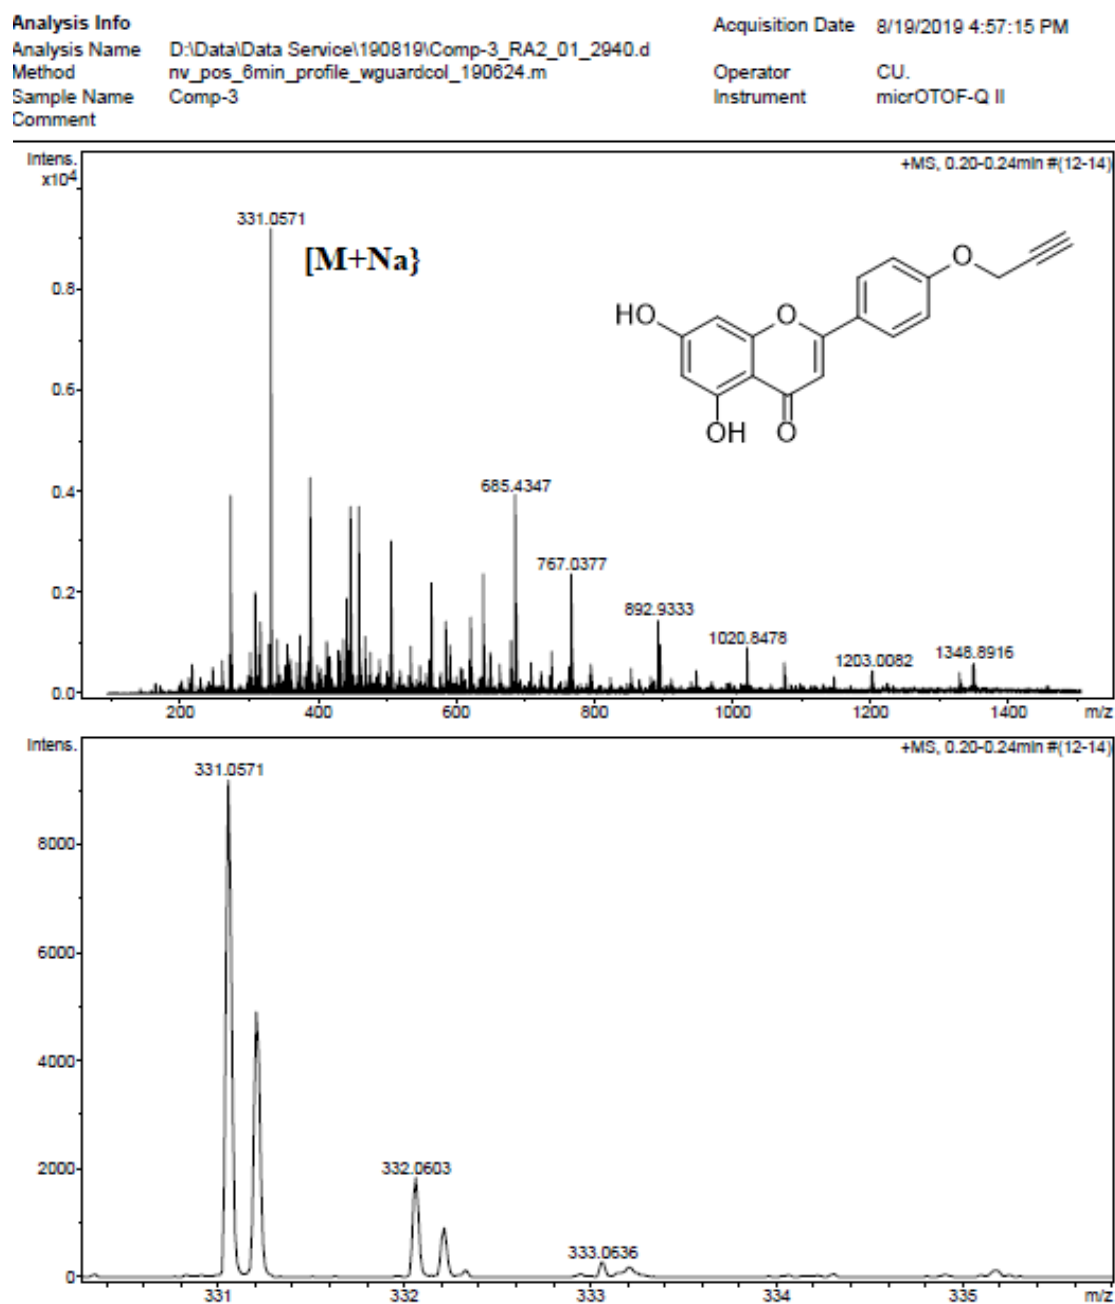

Figure S7. HRMS spectra of 5,7-dihydroxy-2-(4-(prop-2-yn-1-yloxy)phenyl)-4H-chromen-4-one (3).

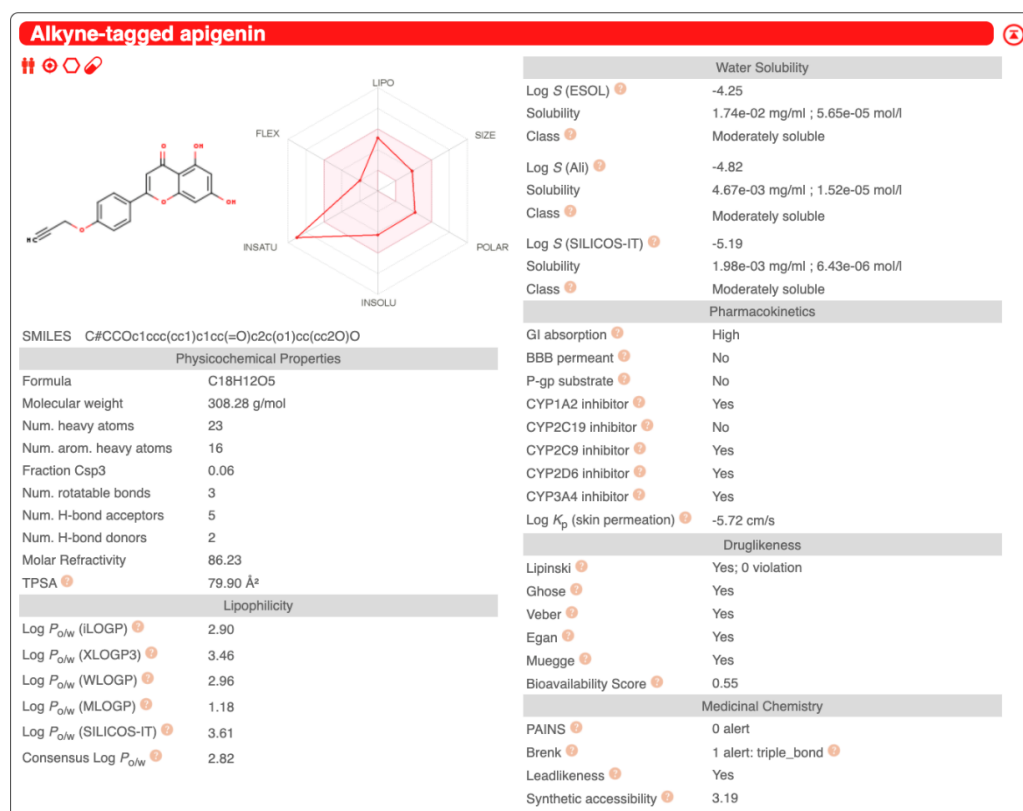

A

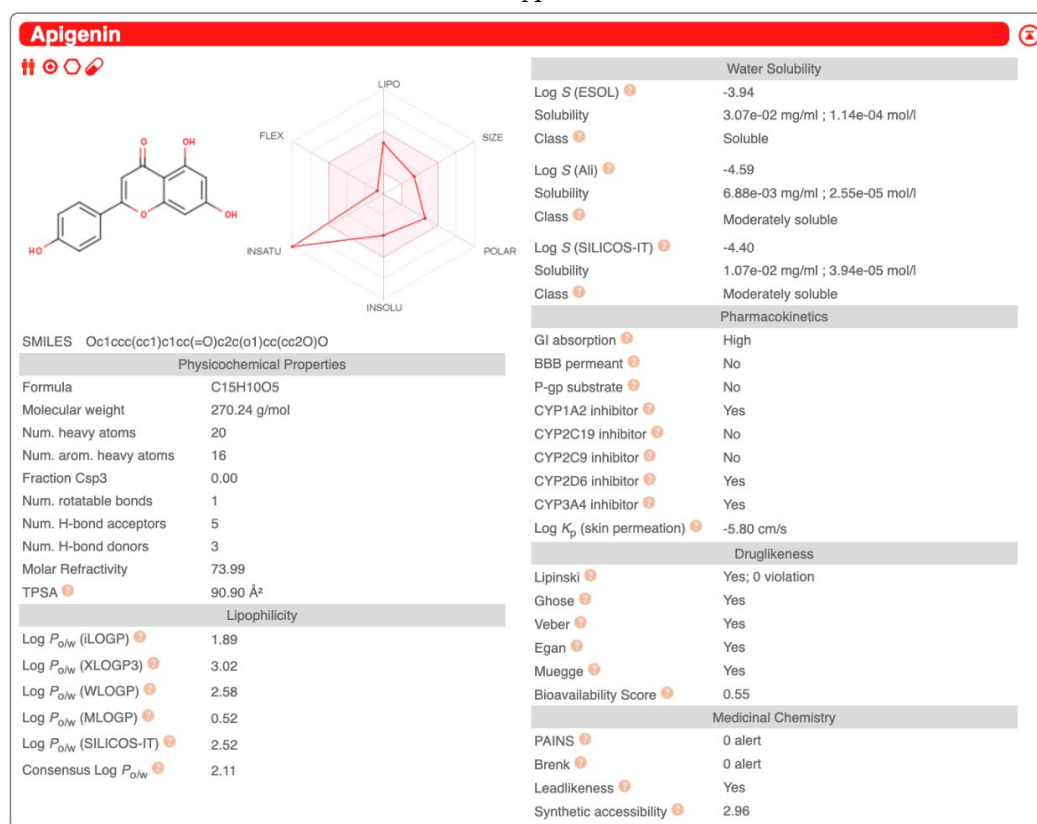

B

**Figure S8.** Pharmacokinetics, drug-likeness and medicinal chemistry by SwissADME for alkyne-tagged apigenine (A) and Apigenin (B).
